# Supplementary material
Source: PubMed Central journal article supplement (PMC5741160)
Supplement: DCi170057SupplementaryData.pdf [file DCi170057SupplementaryData.pdf]

SUPPLEMENTARY DATA

**Supplementary Table S1. Ongoing CVOTs**

| <b>Trial</b>                         | <b>Intervention</b>         | <b>Main Inclusion Criteria</b>                                                                           | <b>Follow-Up (years)</b> | <b>Primary Endpoint</b>                                                                       | <b>Key Secondary Endpoints</b>                                                                          | <b>Year Started/ Expected Completion</b> |
|--------------------------------------|-----------------------------|----------------------------------------------------------------------------------------------------------|--------------------------|-----------------------------------------------------------------------------------------------|---------------------------------------------------------------------------------------------------------|------------------------------------------|
| CAROLINA (44)<br>(n = 6,072)         | Linagliptin/<br>glimepiride | Type 2 diabetes and pre-existing CVD or CV risk factors or age $\geq 70$ years                           | 8                        | 3-point MACE                                                                                  | 4-point MACE                                                                                            | 2010/2019                                |
| CARMELINA (45)<br>(n = 7003)         | Linagliptin/<br>placebo     | Type 2 diabetes and high CV risk (previous CVD and albuminuria, and/or proteinuria and renal compromise) | 4.5                      | 3-point MACE                                                                                  | Renal composite                                                                                         | 2013/2017                                |
| CREDENCE (46)<br>(n = 4,464)         | Canagliflozin/<br>placebo   | Type 2 diabetes and stage 2 or 3 CKD + macroalbuminuria                                                  | 5.5                      | Composite of ESRD, doubling of creatinine, or renal/CV death                                  | Composite of CV death or HF hospitalization                                                             | 2014/2019                                |
| DECLARE-TIMI 58 (47)<br>(n = 17,276) | Dapagliflozin/<br>placebo   | Type 2 diabetes and high risk for CV events                                                              | 6                        | 3-point MACE; composite of CV death or HF hospitalization                                     | Renal composite                                                                                         | 2013/2019                                |
| VERTIS CV (48)<br>(n = 8,000)        | Ertugliflozin/<br>placebo   | Type 2 diabetes and preexisting vascular disease                                                         | 6.1                      | 3-point MACE                                                                                  | 4-point MACE; renal composite; composite of CV death or HF hospitalization                              | 2013/2019                                |
| Dapa-HF (49)<br>(n = 4,500)          | Dapagliflozin/<br>placebo   | Chronic HF and reduced ejection fraction                                                                 | 3                        | Composite of CV death, HF hospitalization, or urgent HF visit                                 | Composite of CV death or HF hospitalization; renal composite                                            | 2017/2019                                |
| Dapa-CKD (50)<br>(n = 4,000)         | Dapagliflozin/<br>placebo   | CKD (eGFR $\geq 25$ and $\leq 75$ mL/min/1.73 m <sup>2</sup> by CKD-EPI formula) + macroalbuminuria      | 4                        | Composite of $\geq 50\%$ sustained decline in eGFR or reaching ESRD, CV death, or renal death | Renal composite; composite of CV death and HF hospitalization; all-cause mortality                      | 2017/2020                                |
| EMPEROR-Reduced (51)<br>(n = 2,850)  | Empagliflozin/<br>placebo   | Chronic HF and reduced ejection fraction                                                                 | 3.2                      | Composite of CV death or HF hospitalization                                                   | First or recurrent HF hospitalization; eGFR slope of change from baseline; sustained reduction of eGFR; | 2017/2020                                |

SUPPLEMENTARY DATA

|                                         |                                                 |                                                                                                             |           |                                                |                                                                                                                                                             |           |
|-----------------------------------------|-------------------------------------------------|-------------------------------------------------------------------------------------------------------------|-----------|------------------------------------------------|-------------------------------------------------------------------------------------------------------------------------------------------------------------|-----------|
|                                         |                                                 |                                                                                                             |           |                                                | CV death; all-cause mortality                                                                                                                               |           |
| EMPEROR-Preserved (52)<br>(n = 4,126)   | Empagliflozin/<br>placebo                       | Chronic HF and<br>preserved ejection<br>fraction                                                            | 3.2       | Composite of CV death<br>or HF hospitalization | First or recurrent HF<br>hospitalization; eGFR<br>slope of change from<br>baseline; sustained<br>reduction of eGFR;<br>CV death; all-cause<br>mortality     | 2017/2020 |
| FREEDOM-CVO<br>(53)*<br>(n = 4,156)     | Exenatide<br>continuous<br>delivery/<br>placebo | Type 2 diabetes and<br>coronary,<br>cerebrovascular or<br>peripheral artery<br>disease                      | 2 years   | 4-point MACE                                   | Not specified                                                                                                                                               | 2013/2016 |
| REWIND (54)<br>(n = 9,901)              | Dulaglutide/<br>placebo                         | Type 2 diabetes and<br>preexisting<br>vascular disease<br>or $\geq 2$ CV risk<br>factors                    | 6.5       | 3-point MACE                                   | Composite of retinal<br>and renal disease;<br>hospitalization for<br>unstable angina; HF<br>hospitalization or<br>urgent visit; all-cause<br>mortality      | 2011/2018 |
| HARMONY<br>Outcomes (55)<br>(n = 9,400) | Albiglutide/<br>placebo                         | Type 2 diabetes and<br>established<br>CVD                                                                   | 3–5 years | 3-point MACE                                   | Expanded MACE,<br>including urgent<br>revascularization for<br>unstable angina;<br>composite of CV<br>death or HF<br>hospitalization                        | 2015/2018 |
| PIONEER 6 (56)<br>(n = 3,176)           | Oral<br>semaglutide/<br>placebo                 | Type 2 diabetes;<br>existing CVD if age<br>$\geq 50$ years or $\geq 1$ CV<br>risk factor if $\geq 60$ years | 1.6       | 3-point MACE                                   | Expanded MACE<br>including<br>hospitalization for<br>unstable angina or<br>HF; composite of all-<br>cause mortality,<br>nonfatal MI, and<br>nonfatal stroke | 2017/2018 |

\*At the time of writing, this study had ended, and a new drug application had been submitted to the FDA, but full results were not yet published. CKD, chronic kidney disease; CKD-EPI, *Chronic Kidney Disease Epidemiology Collaboration*; ER, extended release;

SUPPLEMENTARY DATA

**Supplementary Table S2. CVOTs Not Initiated as a Direct Result of the 2008 FDA Guidance**

|                                     | <b>DEVOTE (57)<br/>(n = 7,637)</b>                                                                                              | <b>ACE (58,61)<br/>(n = 6,522)</b>                                                                   | <b>IRIS (39)<br/>(n = 3,876)</b>                                                                          |
|-------------------------------------|---------------------------------------------------------------------------------------------------------------------------------|------------------------------------------------------------------------------------------------------|-----------------------------------------------------------------------------------------------------------|
| Intervention                        | Degludec/glargine                                                                                                               | Acarbose/placebo                                                                                     | Pioglitazone/placebo                                                                                      |
| Main inclusion criteria             | Type 2 diabetes;<br>age $\geq 50$ years +<br>history of CVD and/or<br>CKD;<br>age $\geq 60$ years + $\geq 1$ CV<br>risk factors | CHD and IGT<br>(conducted in China)                                                                  | Insulin resistance but<br>not diabetes + ischemic<br>stroke or TIA in 6<br>months before<br>randomization |
| A1C inclusion criteria (%)          | $\geq 7.0$ or<br>$< 7.0$ + 20 units basal<br>insulin/day                                                                        | NA                                                                                                   | NA                                                                                                        |
| Mean age (years)                    | 65                                                                                                                              | 64.3                                                                                                 | 65.3                                                                                                      |
| BMI (kg/m <sup>2</sup> )            | 33.6                                                                                                                            | 25.4                                                                                                 | 30                                                                                                        |
| Diabetes duration (years)           | 16.4                                                                                                                            | NA                                                                                                   | NA                                                                                                        |
| Events planned/observed             | 633/681                                                                                                                         | 728/949                                                                                              | —/403                                                                                                     |
| Median follow-up (years)            | 1.99                                                                                                                            | 5                                                                                                    | 4.8                                                                                                       |
| Statin use (%)                      | 79                                                                                                                              | 93                                                                                                   | 82.5                                                                                                      |
| Prior CVD/CHF (%)                   | 83/—                                                                                                                            | 100/3.7                                                                                              | —*                                                                                                        |
| Baseline A1C/A1C change<br>(%)      | 8.4/−0.9<br>(between-group<br>treatment different<br>of 0.01)                                                                   | 5.9/−0.07                                                                                            | 5.8/—                                                                                                     |
| Year started/reported               | 2013/2017                                                                                                                       | 2009/2017                                                                                            | 2005/2016                                                                                                 |
| Primary outcome†                    | 3-point MACE<br>0.91 (0.78–1.06)                                                                                                | 5-point MACE<br>(3-point MACE +<br>hospitalization for HF<br>or unstable angina)<br>0.98 (0.86–1.11) | Composite of fatal and<br>nonfatal<br>stroke and MI<br><b>0.76 (0.62–0.93)</b>                            |
| Key secondary outcome†              | Expanded MACE<br>(3-point MACE plus<br>hospitalization for<br>unstable angina)<br>0.92 (0.80–1.05)                              | 3-point MACE<br>0.95 (0.81–1.11)                                                                     | Stroke; ACS; composite<br>of stroke, MI, and HF<br>leading to<br>hospitalization or death                 |
| CV death†                           | 0.96 (0.76–1.21)                                                                                                                | 0.89 (0.71–1.11)                                                                                     | —                                                                                                         |
| MI†,‡                               | 0.85 (0.68–1.06)                                                                                                                | 1.12 (0.87–1.46)                                                                                     | —                                                                                                         |
| Stroke†,‡                           | 0.90 (0.65–1.23)                                                                                                                | 0.97 (0.70–1.33)                                                                                     | 0.82 (0.61–1.10)                                                                                          |
| HF hospitalization†                 | —                                                                                                                               | 0.89 (0.63–1.24)                                                                                     | —§                                                                                                        |
| Unstable angina<br>hospitalization† | 0.95 (0.68–1.31)                                                                                                                | 1.02 (0.82–1.26)                                                                                     | —                                                                                                         |
| All-cause mortality†                | 0.91 (0.76–1.11)                                                                                                                | 0.98 (0.81–1.19)                                                                                     | 0.93 (0.73–1.17)                                                                                          |
| Worsening nephropathy†              | 1.08 (0.88–1.32)                                                                                                                | —                                                                                                    | —                                                                                                         |

## SUPPLEMENTARY DATA

\*Data for overall CVD not reported; previous coronary artery disease was reported to be 12%, and previous stroke (required for inclusion) was 100%.

†Outcomes reported as HR (95% CI)

‡Reported as nonfatal events only in DEVOTE and as nonfatal and fatal events in ACE and IRIS.

§Adjudicated HF leading to death or hospitalization was 2.6% with pioglitazone compared to 2.2% with placebo.

Bold type indicates statistical significance; —, not assessed/reported; CHF, congestive heart failure; NA, not applicable.
